# Supplementary material for: Long noncoding RNA DANCR promotes invasion of prostate cancer through epigenetically silencing expression of TIMP2/3
Source: PubMed Central journal article supplement (PMC5122356; doi:10.18632/oncotarget.9350), 2016-05-13
Supplement: oncotarget-07-37868-s001.pdf [file oncotarget-07-37868-s001.pdf]

## Long noncoding RNA DANCR promotes invasion of prostate cancer through epigenetically silencing expression of TIMP2/3

### Supplementary Materials

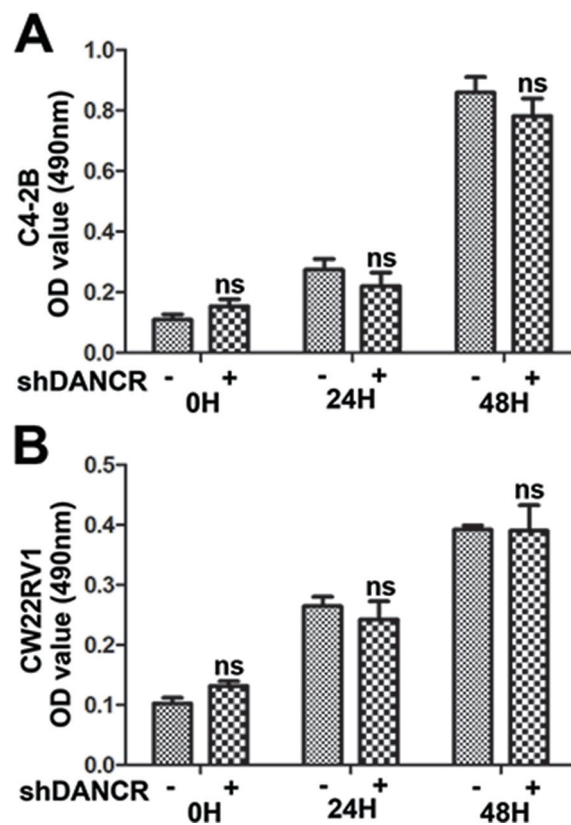

**Supplementary Figure S1: DANCR knockdown does not affect prostate cancer cell proliferation.** (A, B) Knockdown of DANCR does not change cell proliferation in C4-2B (A) and CW22Rv1 (B) cells, as detected by MTT assay.

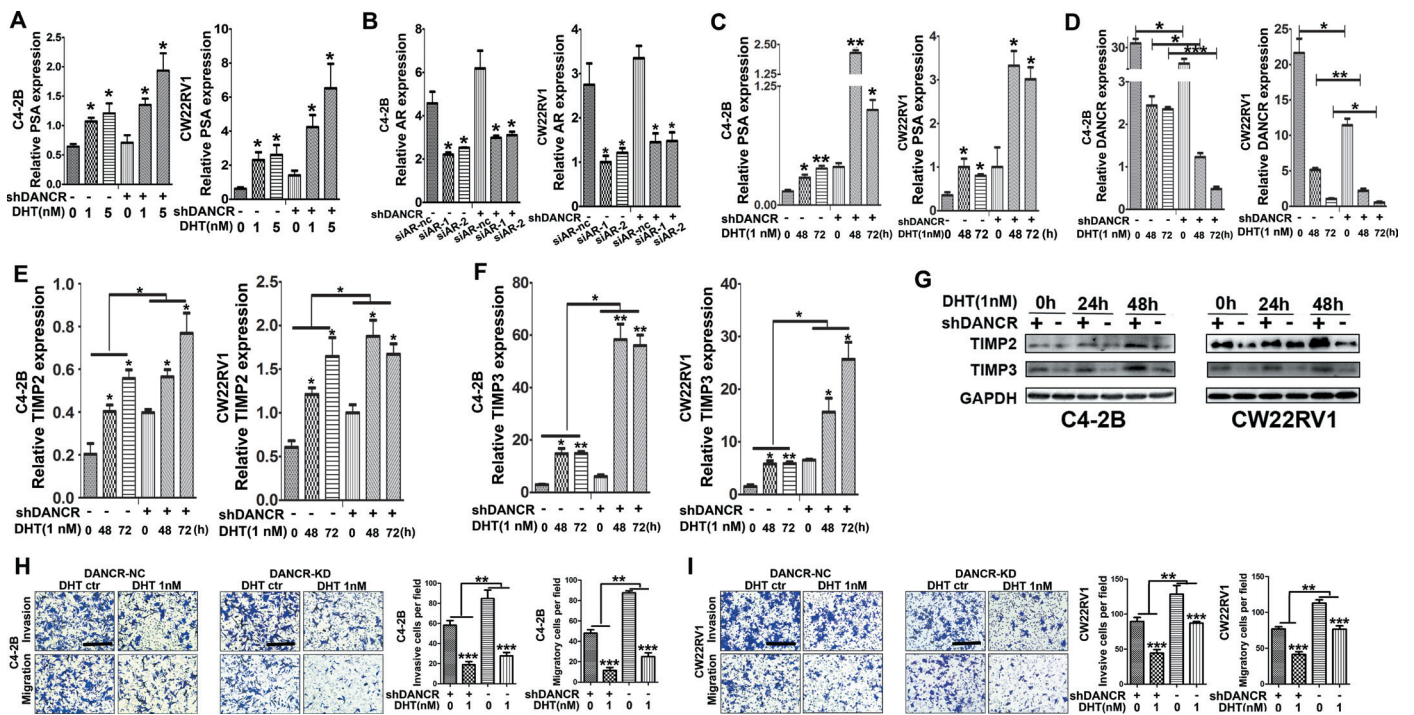

**Supplementary Figure S2: (A) Androgen increases the expression of PSA mRNA in C4-2B and CW22RV1 cells.** The mRNA level of PSA were assayed after 24 hours of additional incubation with 1 nM or 5 nM DHT. These results show data from at least three independent experiments, expressed as the mean SD,  $p < 0.05$ . **(B)** Expression of AR mRNA was decreased by transfection with indicated shRNA. **(C)** Androgen increases the expression of PSA mRNA in C4-2B and CW22RV1 cells. The mRNA level of PSA were assayed after additional incubation with 1 nmol/L DHT for 24 hrs or 48 hrs. **(D)** Androgen decreases the expression of DANCR at different treatment in C4-2B and CW22RV1 cells, as detected by RT-qPCR assay. **(E, F)** Androgen increases the expression of TIMP2/3 at different treatment in C4-2B and CW22RV1 cells, as detected by RT-qPCR assay. **(G)** Androgen increases the expression of TIMP2/3 with different treatment in C4-2B and CW22RV1 cells, as detected by western blot analysis. **(H, I)** Androgen suppresses the invasion and migration of C4-2B and CW22RV1 cells as detected by transwell assay. These results show data from at least three independent experiments. \* $p < 0.05$ , \*\* $p < 0.01$ , \*\*\* $p < 0.001$ .

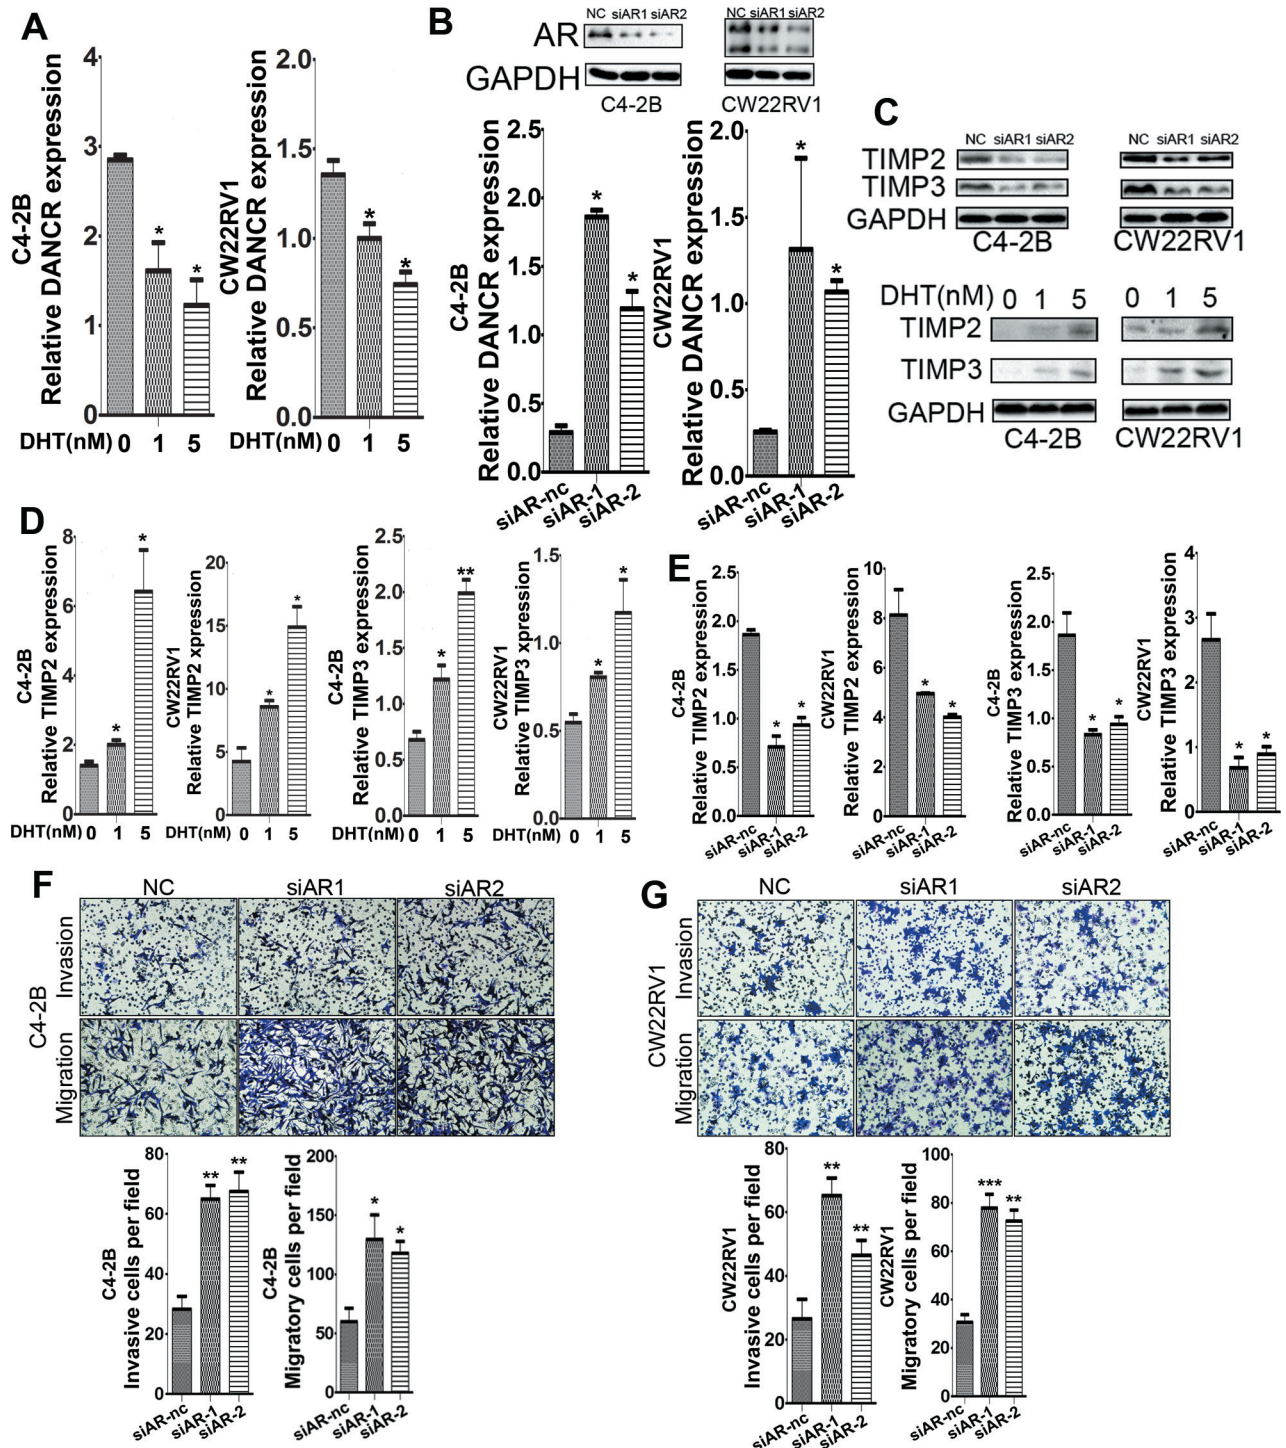

**Supplementary Figure S3: Androgen-AR inhibits the expression of DANCER, up-regulates TIMP2/3 and suppresses invasion and migration of prostate cancer cells.** (A) Androgen inhibits the expression of DANCER in C4-2B and CW22RV1 cells, as detected by RT-qPCR assay. The mRNA level of DANCER were assayed after 24 hours of additional incubation with 1 nmol/L or 5 nmol/L DHT. (B) Knockdown of AR increases the expression of DANCER in C4-2B and CW22RV1 cells, as detected by RT-qPCR assay, and expression of AR was measured by western blot analysis. (C) Androgen treatment increases, while AR knockdown decreases the expression of TIMP2/3 at protein level, as detected by western blot analysis. (D) Androgen treatment increases the expression of TIMP2/3 mRNA in C4-2B and CW22RV1 cells, as detected by RT-qPCR assay. (E) AR knockdown decreases the expression of TIMP2/3 mRNA in C4-2B and CW22RV1 cells, as detected by RT-qPCR assay. (F, G) Knockdown of AR increases the invasion and migration of C4-2B and CW22RV1 cells, as detected by transwell assay. These results show data from at least three independent experiments. \* $p < 0.05$ , \*\* $p < 0.01$ , \*\*\* $p < 0.001$ .

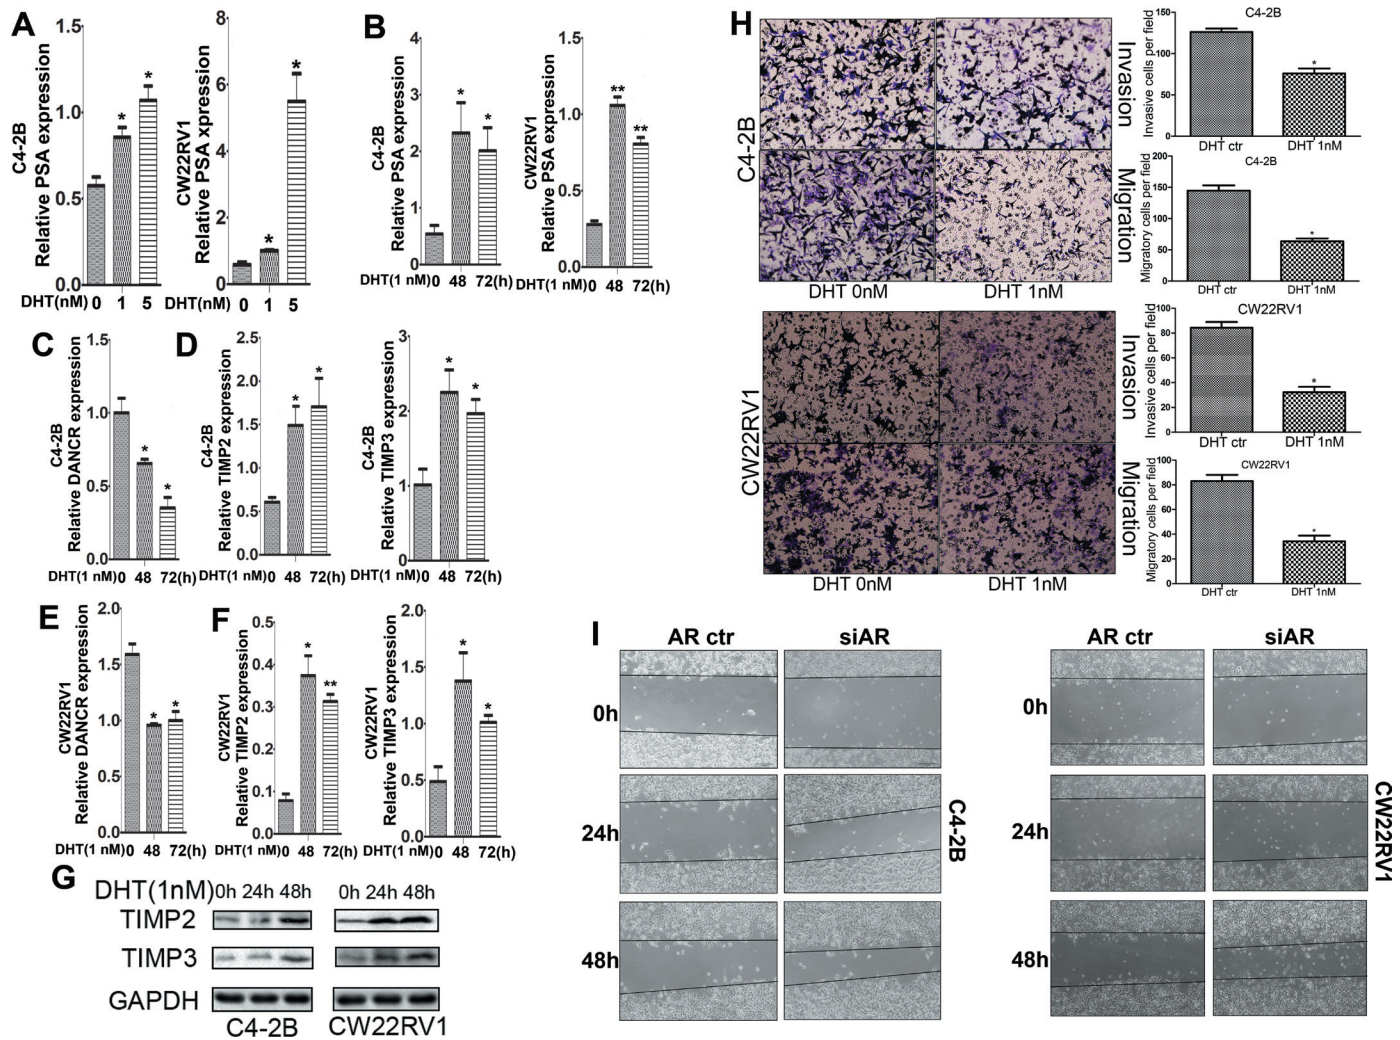

**Supplementary Figure S4: Androgen-AR inhibits the expression of DANCR, up-regulates TIMP2/3 and suppresses invasion and migration of prostate cancer cells.** (A) Androgen increases the expression of PSA mRNA in C4-2B and CW22RV1 cells. The mRNA level of PSA were assayed after 24 hours of additional incubation with 1 nmol/L or 5 nmol/L DHT. These results show data from at least three independent experiments, expressed as the mean  $\pm$  S.D.,  $p < 0.05$ . (B) Androgen increases the expression of PSA mRNA in C4-2B and CW22RV1 cells. The mRNA level of PSA were assayed after additional incubation with 1 nM DHT for 48 h or 72 h. (C, E) Androgen decreases the expression of DANCR at different treatment in C4-2B and CW22RV1 cells, as detected by RT-qPCR assay. (D, F) Androgen increases the expression of TIMP2/3 at different treatment in C4-2B and CW22RV1 cells, as detected by RT-qPCR assay. (G) Androgen increases the expression of TIMP2/3 after additional incubation with 1 nM DHT for 48 h or 72 h in C4-2B and CW22RV1 cells, as detected by western blot analysis. (H) Androgen decreases the cell invasion and migration ability as detected by transwell assay. (I) AR knockdown increases the migration of C4-2B and CW22RV1 cells, as detected by wound healing assay. These results show data from at least three independent experiments. \* $p < 0.05$ , \*\* $p < 0.01$ , \*\*\* $p < 0.001$ .

**Supplementary Table S1: Patients' characteristics**

| <b>Prostate cancer (PCa)</b> |         |
|------------------------------|---------|
| Total number                 | 12      |
| Median age(range), y         | 50      |
| <b>Sex</b>                   |         |
| Male                         | 12      |
| <b>Stage</b>                 |         |
| T1                           | 0       |
| pT2                          | 3       |
| pT3                          | 8       |
| pT4                          | 1       |
| <b>Gleason Score</b>         |         |
| 6                            | 0       |
| 7                            | 4       |
| ≥ 8                          | 8       |
| <b>Operation</b>             |         |
| Radical prostatectomy        | 12      |
| Radiation treatment          | 0       |
| Hormone therapy              | Unknown |
